# Supplementary material for: Weekly green tide mapping in the Yellow Sea with deep learning: integrating optical and synthetic aperture radar ocean imagery
Source: Copernicus journal article supplement (doi:10.5194/essd-16-4189-2024), 2024-09-13
Supplement: Supplementary file 1 [file essd-16-4189-2024-supplement.zip]

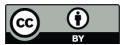

*Supplement of*

## **Weekly green tide mapping in the Yellow Sea with deep learning: integrating optical and synthetic aperture radar ocean imagery**

**Le Gao et al.**

*Correspondence to:* Xiaofeng Li (lixf@qdio.ac.cn)

- [essd-16-4189-2024-supplement-title-page.pdf](#)
- [animation of weekly green tide product.pptx](#)

The copyright of individual parts of the supplement might differ from the article licence.
